# Supplementary material for: Broadband ultrafast photovoltaic detectors based on large-scale topological insulator Sb2Te3/STO heterostructures
Source: Royal Society of Chemistry journal article supplement (doi:10.1039/c7nr01715d), 2017-01-01
Supplement: c7nr01715d1.pdf [file c7nr01715d1.pdf]

## Electronic Supplementary Information

# Broadband Ultrafast Photovoltaic Detectors Based on Large-scale Topological Insulator Sb<sub>2</sub>Te<sub>3</sub>/STO Heterostructures

Honghui Sun<sup>1,†</sup>, Tian Jiang<sup>\*1,2,3,5,†</sup>, Yunyi Zang<sup>3,†</sup>, Xin Zheng<sup>1,5</sup>, Yan Gong<sup>3</sup>, Yong Yan<sup>4</sup>, Zhongjie Xu<sup>2,5</sup>, Yu Liu<sup>2</sup>, Liang Fang<sup>\*1,5</sup>, Xiang'ai Cheng<sup>2,5</sup> and Ke He<sup>3</sup>

<sup>1</sup>State Key Laboratory of High Performance Computing, College of Computer, National University of Defense Technology, Changsha 410073, China

<sup>2</sup>College of Optoelectronic Science and Engineering, National University of Defense Technology, Changsha 410073, China

<sup>3</sup>State Key Laboratory of Low-Dimensional Quantum Physics, Department of Physics, Tsinghua University, Beijing 100084, China

<sup>4</sup>Henan key laboratory of photovoltaic materials, college of physics and materials science, Henan Normal University, Xinxiang 453007, china

<sup>5</sup>Interdisciplinary Center of Quantum Information, National University of Defense Technology, Changsha 410073, China

Address correspondence to Tian Jiang, [tjiang@nudt.edu.cn](mailto:tjiang@nudt.edu.cn); Liang Fang,

[lfang@nudt.edu.cn](mailto:lfang@nudt.edu.cn)

### 1. Film thickness of $\text{Sb}_2\text{Te}_3$

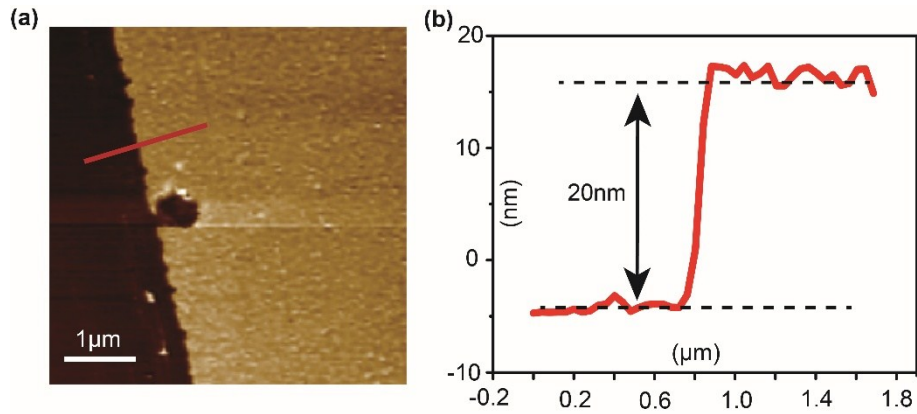

Figure S1. Film thickness of the  $\text{Sb}_2\text{Te}_3$  film in  $\text{Sb}_2\text{Te}_3/\text{STO}$  heterostructure. (a) The AFM image of 20 QL  $\text{Sb}_2\text{Te}_3$  film. (b) The line profile along the red line in (a).

### 2. Absorption spectra of $\text{Sb}_2\text{Te}_3$ film

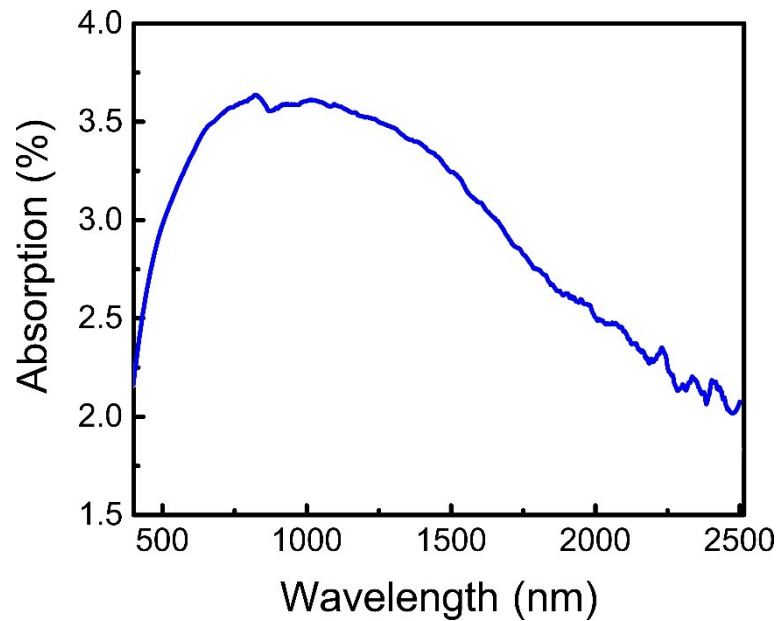

Figure S2. Absorption spectra of the  $\text{Sb}_2\text{Te}_3$  topological insulation film with the thickness of 20 nm from 400 nm to 2500 nm.

### 3. Transmittance spectra of ITO top electrode

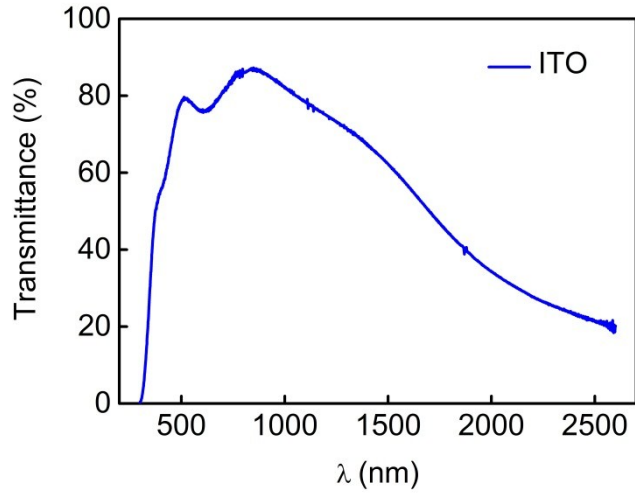

Figure S3. The transmittance spectra of the ITO top electrode.

#### 4. Confirmation of the p-n junction in the $\text{Sb}_2\text{Te}_3/\text{STO}$ photodetector

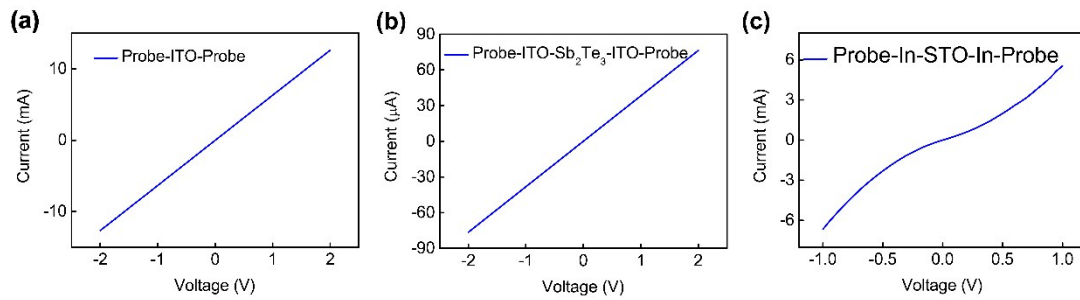

Figure S4. Contact performance. (a) and (b) show the contact behaviors of ITO with probe and  $\text{Sb}_2\text{Te}_3$ , indicating perfect Ohmic contact. (b) ITO with  $\text{Sb}_2\text{Te}_3$  contact, suggesting a negligible barrier.

#### 5. Ideality factor.

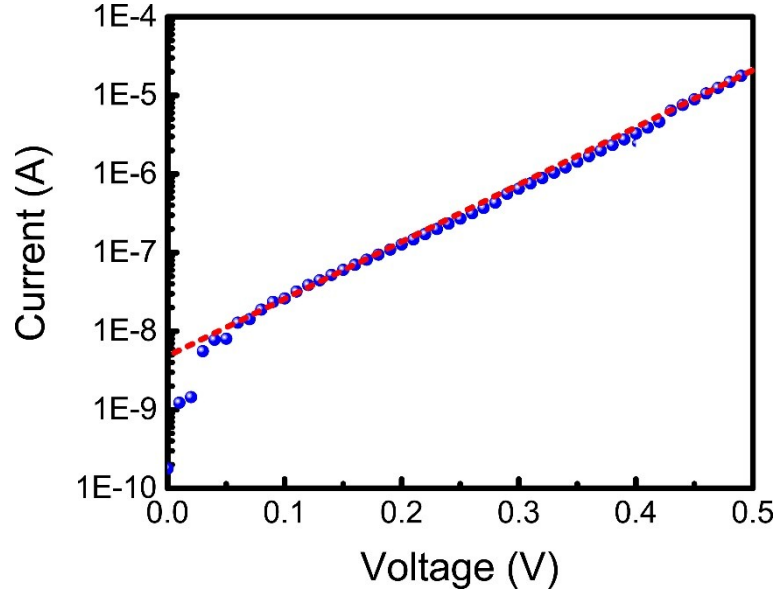

Figure S5. I-V curve of the Sb<sub>2</sub>Te<sub>3</sub>/STO heterostructure. The semi-logarithmic curve is fitted by a straight line.

The ideality factor ( $n$ ) of the heterojunction could be deduced to be 1.59 from the slope of the semi-log  $I$ - $V$  curve in the forward bias direction, according to the following equation:<sup>1</sup>

$$n = \frac{q}{k_B T} \frac{dV}{d \ln I}$$

where  $q$  is the electron charge,  $k_B$  is the Boltzmann constant, and  $T$  is the absolute temperature.

## 6. Responsivity spectra from 405 nm to 1550 nm

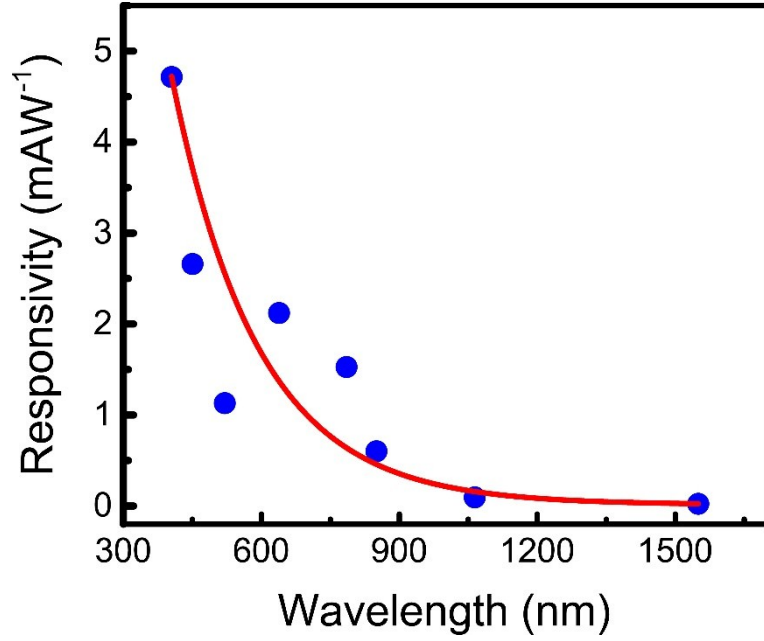

Figure S6. Responsivity spectra of the  $\text{Sb}_2\text{Te}_3/\text{STO}$  photodetector. Power densities at each illumination wavelength were calibrated to be same ( $236.81\text{mWcm}^{-2}$ ).

### 7. Hall effect measurement of STO at 300K

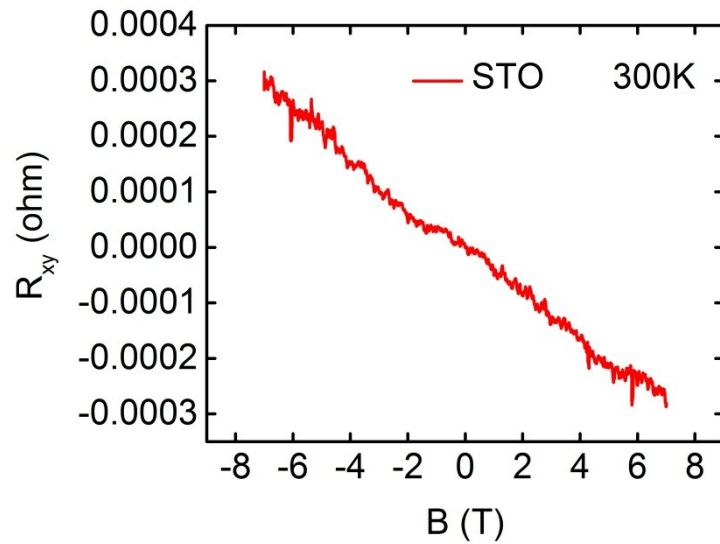

Figure S7. Hall effect measurement of STO at 300K. The electron concentration ( $N_e$ ) of  $3 \times 10^{20}\text{ cm}^{-3}$  is extracted from the Hall slop.

## 8. Temperature-dependent photoresponse of the heterostructure under 1064 nm illumination

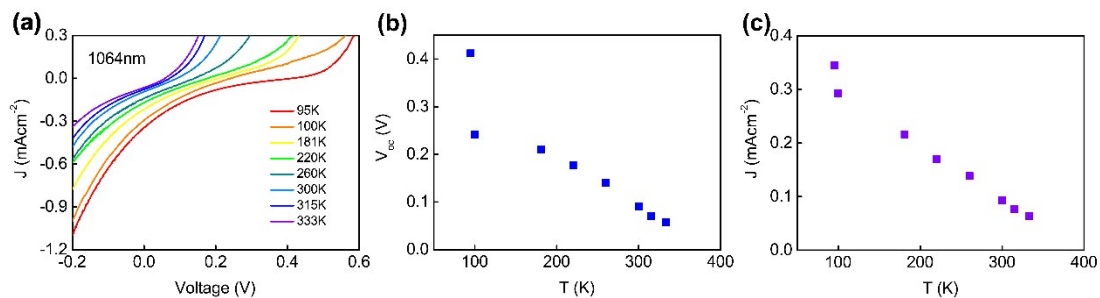

Figure S8. Temperature-dependent photoresponse of the heterostructure under 1064 nm illumination. (a) J-V characteristics of the heterostructure at different T. (b) and (c) show the dependence of  $V_{oc}$  and  $J_{sc}$  on temperature (T).

### References:

1. X. Zhang, X. Zhang, X. Zhang, Y. Zhang, L. Bian, Y. Wu, C. Xie, Y. Han, Y. Wang and P. Gao, *Journal of Materials Chemistry*, 2012, **22**, 22873-22880.
